# Supplementary material for: A Scoping Review of Parenting Interventions with a Dual Focus on Improving Child Emotional and Physical Health
Source: Research Square preprint supplement (doi:10.21203/rs.3.rs-7150758/v1), 2025-08-27
Supplement: Supplementary file 1 [file 86eb38aa8faede813810d254.docx]

**Full Search Strategy for PubMed Database**

| **Step** | **Criteria** | **Search Terms** |
| --- | --- | --- |
| 1 | has to include children ages 2-12 | "Child*" "toddler*" "youth*" "preschool*" "pre-school*" |
| 2 | has to be a parent training program | "Parenting program*" OR "parent program*" OR "Parenting intervention*" OR "parent intervention*" OR "Parent training*" OR "parenting training*" OR "parental training*" OR "positive parenting program*" OR "Parent education*" OR "parental education*" OR "parenting education*" OR "relationship education*" OR "marriage education*" OR "family program*" OR "families program*" OR "family intervention*" OR "families intervention*" OR "family training*" OR "family education*" OR "Behavior training*" OR "Behaviour training*" OR "Behavior intervention*" OR "Behaviour intervention*" OR "Behavior program*" OR "Behaviour program*" OR "Behavioral intervention*" OR "Behavioural program*" OR "Behavioral parenting intervention*" OR "Behavioural parenting intervention*" OR "Behavioral family intervention*" OR "Behavioural family intervention*" OR "Parent management training*" OR "parent skills training*" OR "parenting skills training*" OR "parent-based intervention*" OR "family-based intervention*" OR "parent support*" OR "parenting support*" OR "family-focused intervention*" OR "family-centered intervention*" OR "family-centered program*" OR "parent-focused intervention*" OR "family-based prevention*" OR "family preventive*" OR "Parent-Child Interaction Therapy" OR "Incredible Years" OR "parents as teachers" OR "Family check-up" OR "parent-child intervention*" OR "family-based therapy*" |
| 3 | has to focus on child social, emotional, or behavioral functioning | "child behavio*" OR "child adjustment" OR "problem behavio*" OR "behavior problem*" OR "behavioral problem*" OR "behaviour problem*" OR "behavioural problem*" OR "disruptive behavio*" OR "behavior difficult*" OR "behavioral difficult*" OR "behaviour difficult*" OR "behavioural difficult*" OR "conduct problem*" OR "conduct disorder*" OR "conduct difficult*" OR "aggressive behavio*" OR "behavior disorder*" OR "behavioral disorder*" OR "behaviour disorder*" OR "behavioural disorder*" OR "oppositional defiant disorder*" OR "Attention Deficit*" OR "Impulsive Behavio*" OR "Oppositional Defiant Disorder" OR "Obsessive-compulsive disorder*" OR "Attention-Deficit/Hyperactivity Disorder ADHD" OR "ADHD" OR "social skills" OR "social behavio*" OR "socializing behavio*" OR "social problem*" OR "socializing behavio*" OR "prosocial skills" OR "prosocial behavio*" OR "pro-social skills" OR "pro-social behavio*" OR "antisocial behavio*" OR "antisocial problem*" OR "externalizing disorder*" OR "externalizing problem*" OR "internalizing disorder*" OR "internalizing problem*" OR "emotional behavior problem*" OR "emotional behavioral problem*" OR "emotional behavioral disorder*" OR "emotional behavioural problem*" OR "emotional behavioral disorder*" OR "disruptive behavio*" OR "Aggression" OR "emotion regulation*" OR "emotional regulation*" OR "emotional problem*" OR "emotional difficult*" OR "social-emotional" OR "self-regulation" OR "self-control" OR "anxiety" OR "stress" OR "mood" OR "executive function*" |
| 4 | has to focus on child health or lifestyle behaviors | "child health*", "health behavior*", health behavior[mesh], "health behaviour*", "health risk behavior*", "health risk behaviour*", "healthy lifestyle*", healthy lifestyle[mesh], "lifestyle*", "health-related behavior*", "health-related behaviour*", "sleep", "physical activit*", "exercise", "screen time", "screen use", "screen usage", "sedentary behavior*", "diet*", "healthy eating", "nutrition", "eating", "body mass index", "weight", "obesity", "obesogenic behavior*" |
| 5 | combine all fields | #1 AND #2 AND #3 AND #4 Filters: English, from 2013 - 2023 |
