# Supplementary material for: A Scoping Review of Parenting Interventions with a Dual Focus on Improving Child Emotional and Physical Health
Source: Research Square preprint supplement (doi:10.21203/rs.3.rs-7150758/v1), 2025-08-27
Supplement: Supplementary file 2 [file da19ea630b00d0151db9e2f0.xlsx]

## Sheet: Study Characteristics
Study ID	Title	Form	Reviewer	Status	Intervention	Linked suggestion	Group name	Identification: Sponsorship source	Identification: Country	Identification: Comments	Identification: Author's name	Identification: Institution	Identification: Email	Identification: Other	Identification: Publication date	Identification: Notes	Methods: Design	Methods: Group	Methods: Number of Assessment Timepoints	Methods: Number of Study Arms	Methods: Other	Methods: Notes	Population: Inclusion criteria	Population: Exclusion criteria	Population: Group differences	Population: Assessment completion rate (% of each assessment)	Population: Other	Population: Session completion rate (%)	Population: Total sample size	Population: Notes	Population Baseline Characteristics: Child age (mean and standard deviation) (Overall)	Population Baseline Characteristics: Child gender (list all %s) (Overall)	Population Baseline Characteristics: Child race/ethnicity (list all %s) (Overall)	Population Baseline Characteristics: Parent age (mean years and standard deviation) (Overall)	Population Baseline Characteristics: Parent gender (list all %s) (Overall)	Population Baseline Characteristics: Parent race/ethnicity (list all %s) (Overall)	Population Baseline Characteristics: Nativity/birth country (%born in US, %born outside US) (Overall)	Population Baseline Characteristics: Income/SES (list all income/SES data) (Overall)	Population Baseline Characteristics: Other (Overall)	Intervention Characteristics: Number of sessions	Intervention Characteristics: Length of session (minutes)	Intervention Characteristics: Frequency (e.g., sessions per week)	Intervention Characteristics: Format (individual or group-based)	Intervention Characteristics: Who delivers intervention (e.g., licensed mental health counselor, nurse, community health worker)	Intervention Characteristics: Family members included (e.g., parent, parent and child, whole family)	Intervention Characteristics: Intervention theory (e.g., social learning theory, Cognitive-behavioral, attachment theory)	Intervention Characteristics: Primary outcome/s (list all)	Intervention Characteristics: Secondary outcome/s (list all)	Intervention Characteristics: Intervention components (list all)
[truncated: 9 more columns]

## Sheet: Study Outcomes
Extractor name	Study ID	Author & Year	Where info was found	Groups compared	Type of comparison	Other Notes	SEF Outcome 1			SEF Outcome 2			SEF Outcome 3			SEF Outcome 4			SEF Outcome 5			SEF Outcome 6			SEF Outcome 7			SEF Outcome 8			SEF Outcome 9			SEF Outcome 10			SEF Outcome 11			SEF Outcome 12				SEF Outcome 13		HLI Outcome 1			HLI Outcome 2
							Beneficial Effect	Null Effect	Adverse Effect	Beneficial Effect	Null Effect	Adverse Effect	Beneficial Effect	Null Effect	Adverse Effect	Beneficial Effect	Null Effect	Adverse Effect	Beneficial Effect	Null Effect	Adverse Effect	Beneficial Effect	Null Effect	Adverse Effect	Beneficial Effect	Null Effect	Adverse Effect	Beneficial Effect	Null Effect	Adverse Effect	Beneficial Effect	Null Effect	Adverse Effect	Beneficial Effect	Null Effect	Adverse Effect	Beneficial Effect	Null Effect	Adverse Effect	Beneficial Effect	Null Effect	Adverse Effect	Beneficial Effect	Null Effect	Adverse Effect	Beneficial Effect	Null Effect	Adverse Effect	Beneficial Effect
[truncated: 32 more columns]
